# Supplementary material for: One pot synthesis of heterometallic 3d–3d azido architectures: assembling strategy and magnetic properties
Source: Royal Society of Chemistry journal article supplement (doi:10.1039/c2dt12183b), 2012-01-01
Supplement: c2dt12183b.pdf [file c2dt12183b.pdf]

## Supporting Information

### One Pot Synthesis of Heterometallic 3d-3d Azide Architectures: Assembling Strategy and Magnetic Properties

Jiong-Peng Zhao, Ran Zhao, Qian Yang, Wei-Chao Song, Bo-Wen Hu, Xiao-Feng Zhang and

Xian-He Bu\*

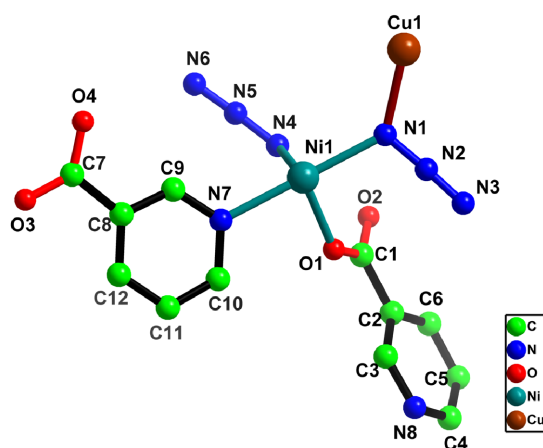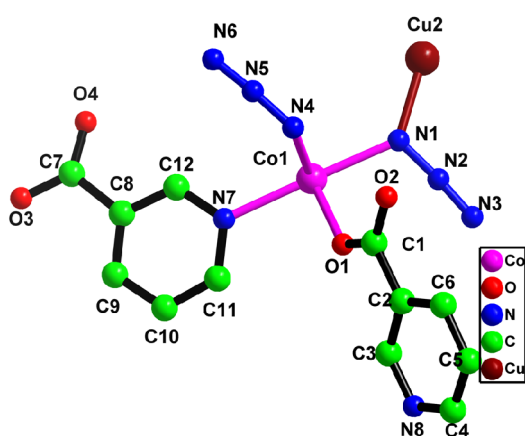

**Figure S1.** The asymmetric unit of the two complexes: a) for **1** and b) for **2**.

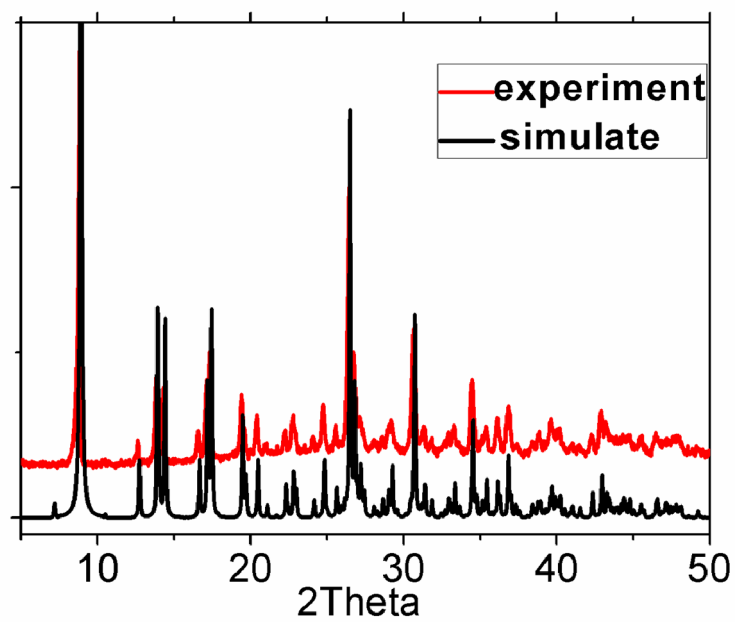

a)

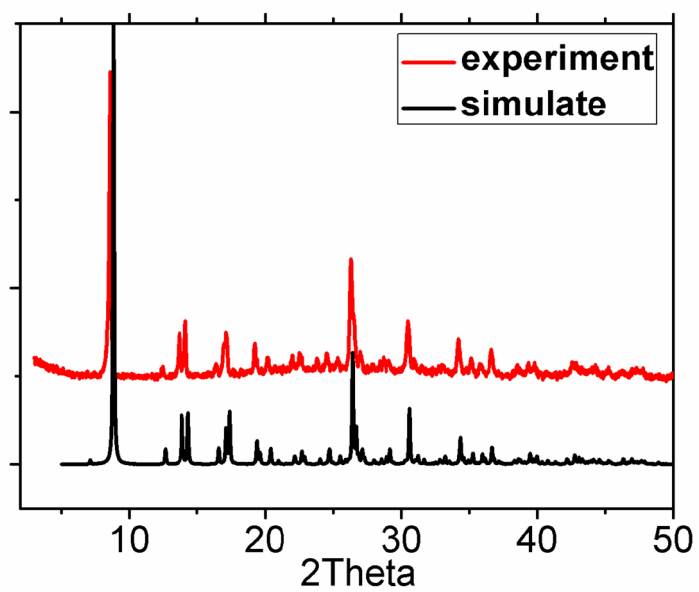

b)

**Figure S2.** The XRPD plots for complex: a) 1, b) 2.

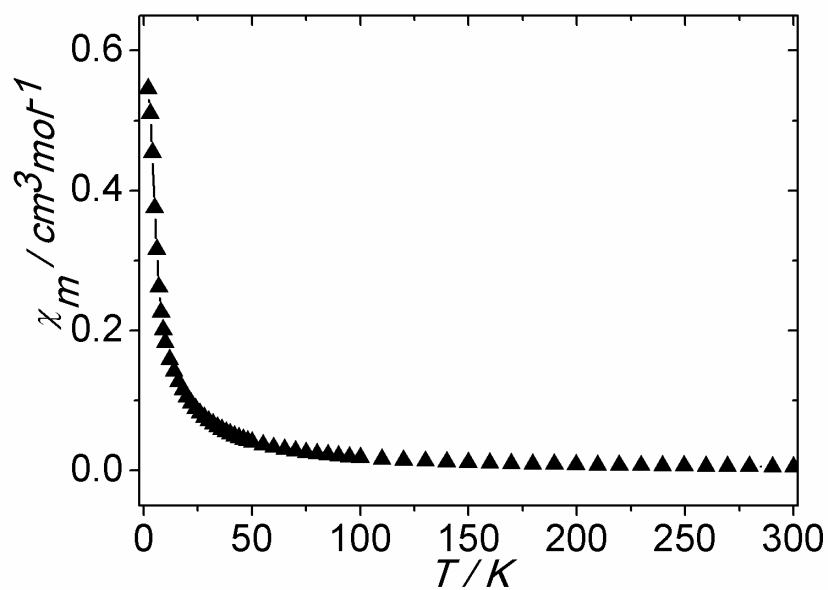

**Figure S3.** Plots of observed  $\chi_m$  vs  $T$  at 0.1 T of **1**.

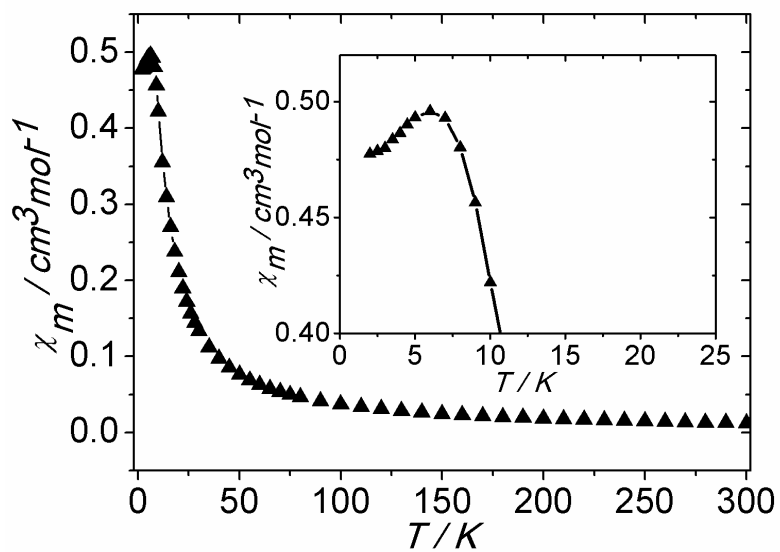

**Figure S4.** Plots of observed  $\chi_m$  vs  $T$  at 0.2 T of **2**.

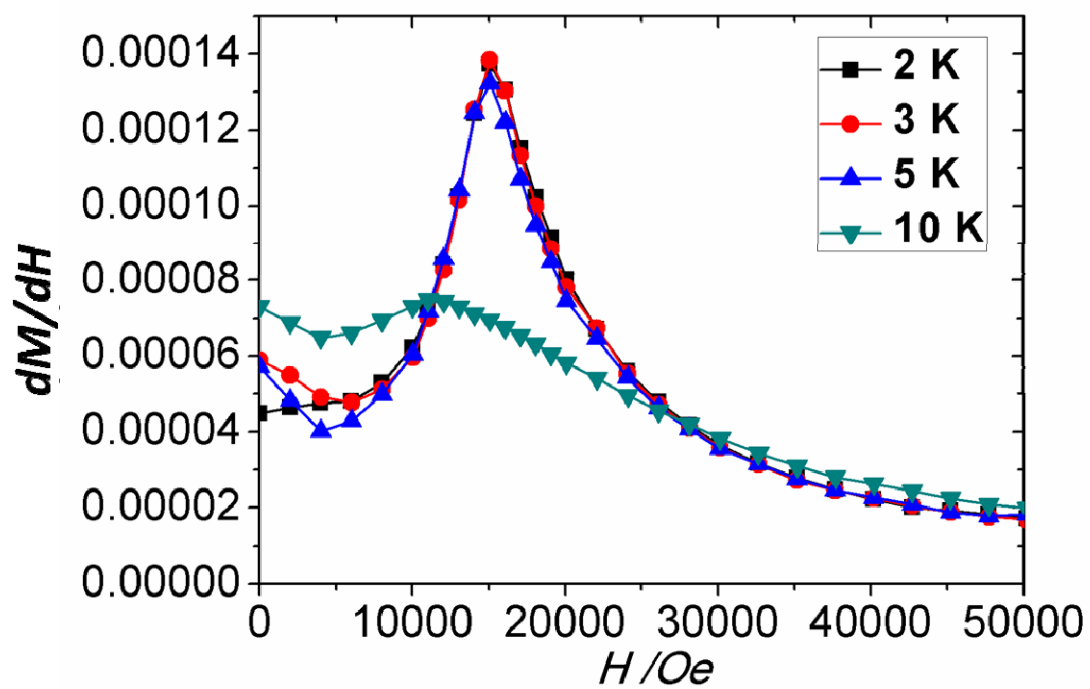

**Figure S5.** The  $dM/dH$  vs  $H$  plots of **2** at 2, 3, 5 and 10 K.
